# Supplementary material for: Determinants of tuberculosis treatment outcome under directly observed treatment short courses in Adama City, Ethiopia
Source: PubMed Central journal article supplement (PMC7190142; doi:10.1371/journal.pone.0232468), 2020-04-29
Supplement: pone.0232468.s001.pdf [file pone.0232468.s001.pdf]

**Data Collection Instrument /Checklist and questionnaire**

Date of data collection [\_\_\_/\_\_\_/\_\_\_\_] (dd/mm/yyyy)

Name of the data collector \_\_\_\_\_ Signature \_\_\_\_\_

Time (Started/ Ended) [\_\_\_/\_\_\_\_; \_\_\_/\_\_\_\_] (hr. /min)

For supervisor only:

Any incomplete or inconsistent data available: Yes/No

If yes, type and action taken: \_\_\_\_\_

\_\_\_\_\_

*(Please use additional blank paper if the space is not enough)*

Supervisor Name \_\_\_\_\_

Signature \_\_\_\_\_ Date [\_\_\_/\_\_\_/\_\_\_\_] (dd/mm/yyyy)

**Check list**

| <b>Part 1: Socio Demographic Information</b> |                                                                      |                                                                              |
|----------------------------------------------|----------------------------------------------------------------------|------------------------------------------------------------------------------|
| <b>S. No</b>                                 | <b>Questions</b>                                                     | <b>Response</b>                                                              |
| 1.1                                          | Name of the treatment initiating center                              | ..... hospital/health center                                                 |
| 1.2                                          | Type of treatment initiating center                                  | Ambulatory model of care-----1<br>Hospitalized/inpatient model of care-----2 |
| 1.3                                          | Patient - TB registration number                                     | -----                                                                        |
| 1.4                                          | Patient medical record number (MRN)                                  | -----                                                                        |
| 1.5                                          | Patient unique number(Region/type of facility/facility code/ number) | -----/-----/-----/DR-----                                                    |
| 1.6                                          | Age                                                                  | ..... in complete Years                                                      |
| 1.7                                          | Sex                                                                  | Male-----1<br>Female-----2                                                   |
| 1.8                                          | Address                                                              | Urban-----1<br>Rural-----2                                                   |

|                                                                                                             |                                                        |                                                                                       |
|-------------------------------------------------------------------------------------------------------------|--------------------------------------------------------|---------------------------------------------------------------------------------------|
| 1.9                                                                                                         | Distance from treatment center                         |                                                                                       |
| 1.10                                                                                                        | Educational Status                                     |                                                                                       |
|                                                                                                             | Religion                                               | Orthodox-----1<br>Protestant-----2<br>Catholic-----3<br>Musilim-----4<br>Others-----5 |
| 1.11                                                                                                        | Family size                                            | Two-----1<br>Three-----2<br>Four and above----3                                       |
| 1.12                                                                                                        | Is there TB case history in your family                | On Treatment in this time----1<br>Previously treated -----2                           |
| 1.13                                                                                                        | Occupation/employment                                  | Governmental employed----1                                                            |
|                                                                                                             |                                                        | Private employed/NGO-----2                                                            |
|                                                                                                             |                                                        | Merchant-----3                                                                        |
|                                                                                                             |                                                        | Farmer-----4                                                                          |
|                                                                                                             |                                                        | Daily laborer and other-----5                                                         |
| 1.14                                                                                                        | Income/per month                                       | In Ethiopia birr-----                                                                 |
| 1.15                                                                                                        | Do you know TB is curable                              | Yes-----1<br>No-----2<br>I am not sure ----3                                          |
| 1.16                                                                                                        | Is TB Drugs are safe?                                  | Yes-----1<br>No-----2<br>I am not sure ----3                                          |
| <b>Part 2: clinical Conditions at initiation, during treatment and at the end of intensive of treatment</b> |                                                        |                                                                                       |
| 2.1                                                                                                         | Has the patient contact person/<br>treatment supporter | Yes-----1<br>No -----2                                                                |

|     |                                                                           |                                                                                                                                                                                                                                                          |
|-----|---------------------------------------------------------------------------|----------------------------------------------------------------------------------------------------------------------------------------------------------------------------------------------------------------------------------------------------------|
| 2.2 | If yes to question no 2.1, who was/is contact person/treatment supporter? | HEW-----1<br>Health care worker-----2<br><br>Family member-----3<br>Self administer-----4<br>Health development army member-----5<br>Other(specify)-----98<br>Missing .....99                                                                            |
| 2.3 | Category of –TB                                                           | Smear positive pulmonary TB-----1<br>Smear negative pulmonary -TB-----2<br>Extra pulmonary -TB-----3                                                                                                                                                     |
| 2.4 | Has the patient had previous history of first line TB treatment           | Yes-----1<br>No-----2<br>Missing-----99                                                                                                                                                                                                                  |
| 2.5 | If yes to 2.7, what were/was the frequency of treatment?                  | One times-----1<br>Two times-----2<br>Three times-----3<br>Missing -----99                                                                                                                                                                               |
| 2.6 | What was the patient category before treatment initiation                 | New(N)-----1<br>Relapse(R)-----2<br>Treatment after failure of New TB regimen-----3<br>Treatment after failure of Retreatment regimen-----4<br>Treatment after being lost to followup-----5<br>Transfer in(T)-----6<br>Others(O)-----7<br>Missing-----99 |

|        |                                                                    |                                                                                                                    |
|--------|--------------------------------------------------------------------|--------------------------------------------------------------------------------------------------------------------|
| 2.7    | TB diagnosed date                                                  | ...../...../..... (dd/mm/yyyy)                                                                                     |
| 2.8    | TB treatment started date                                          | ...../...../..... (dd/mm/yyyy)                                                                                     |
| 2.9    | Category of treatment                                              | <b>New:</b> 2RHZE/4RH .....1<br><br><b>Previously treated:</b> Treatment after failure:- 2RHZES/1RHZE/5RHE) .....2 |
| 2.10   | TB treatment regimen                                               | .....(Write the name of drugs)                                                                                     |
| 2.10.1 | Intensive phase                                                    | Yes-----1<br>No-----2<br>Missing -----99                                                                           |
| 2.10.2 | Continuation phase                                                 | Yes-----1<br>No-----2<br>Missing -----99                                                                           |
| 2.11   | Was/is the -TB treatment regimen changed?                          | Yes-----1<br>No-----2<br>Missing-----99                                                                            |
| 2.12   | If yes to number 2.11,name of changed -TB treatment regimen(drugs) | ---,---,---,---,---,---<br>drugs(name of drug in abbreviation)                                                     |
| 2.13   | If yes, what was/is the reason?                                    | Due to side effect-----1<br>Due to other disease-----2<br>Due to sotck out-----98<br>Missing .....99               |

|      |                                                                                                         |                                                                                                                                                                                                                                                                                                                                                     |
|------|---------------------------------------------------------------------------------------------------------|-----------------------------------------------------------------------------------------------------------------------------------------------------------------------------------------------------------------------------------------------------------------------------------------------------------------------------------------------------|
| 2.14 | Weight(kg)of the patient at respective months of treatment                                              | -----kg at initiation of treatment(zero months)<br>..... kg at 1st month of treatment<br>..... kg at 2 <sup>th</sup> month of treatment<br>..... kg at 3 <sup>th</sup> month of treatment<br>..... kg at 5 <sup>th</sup> month of treatment<br>..... kg at 6 <sup>th</sup> month of treatment<br>-----kg at 8 <sup>th</sup> month of treatment etc. |
| 2.15 | Was the patient tested for HIV/AIDS?                                                                    | Yes.....1<br>No-----2<br>Missing .....99                                                                                                                                                                                                                                                                                                            |
| 2.16 | If yes to question no 2.19,what was/is the HIV/AIDS status of the patient                               | Reactive.....1<br>Non-reactive.....2<br>Indeterminate.....3<br>Unknown.....4                                                                                                                                                                                                                                                                        |
| 2.17 | If yes to number 2.20 above, what is/was the CD4 count (write the actual number or % for children) at : | Baseline=-----1<br>Six months=-----2<br>12 months=-----3<br>Missing .....99                                                                                                                                                                                                                                                                         |
| 2.18 | If reactive for question number 2.21, is/was the patient put on Cotrimozale preventive therapy (CPT)    | Yes -----1[write CPT started date (DD/MM/YY)___/___/___]<br>No.....2<br>Missing .....99                                                                                                                                                                                                                                                             |
| 2.19 | If reactive for question number 2.22, is/was the patient linked to the chronic HIV/AIDS care (pre-ART)? | Yes -----1[write the date on which linked to chronic care (DD/MM/YY)___/___/___]<br>No.....2<br>Missing .....99                                                                                                                                                                                                                                     |

|      |                                                                                                                                                                  |                                                                                                                                                                                                                                                                                          |
|------|------------------------------------------------------------------------------------------------------------------------------------------------------------------|------------------------------------------------------------------------------------------------------------------------------------------------------------------------------------------------------------------------------------------------------------------------------------------|
| 2.20 | If reactive for question number 2.23, is/was the patient initiated on ART?                                                                                       | Yes -----1[write the date on which initiated on ART (DD/MM/YY)____/____/____]<br>No.....2<br>Missing .....99                                                                                                                                                                             |
| 2.21 | Smear conversion follow up result (only for sputum smear positives PTB):<br>Positive-----1<br>Negative-----2<br>Not done-----3<br>Unknown-----4<br>Missing-----5 | .....at 2 <sup>th</sup> month of treatment<br>.....at 3 <sup>th</sup> month of treatment<br>..... at 5 <sup>th</sup> month of treatment<br>.....at 6 <sup>th</sup> month of treatment<br>----- at 8 <sup>th</sup> month of treatment etc.                                                |
| 2.22 | If suspected MDR X/Pert or Culture result at result:<br>(positive-----1<br>Negative-----2<br>Not done-----3<br>Unknown-----4<br>missing-----5                    | -----at initiation of treatment(zero months)<br>.....at 2 <sup>th</sup> month of treatment<br>.....at 3 <sup>th</sup> month of treatment<br>.....at 5 <sup>th</sup> month of treatment<br>.....at 6 <sup>th</sup> month of treatment<br>----- at 8 <sup>th</sup> month of treatment etc. |
| 2.26 | What is patient's treatment outcome at the end of 6 <sup>th</sup> month (new cases ) of treatment                                                                | cured -----1<br>treatment complete -----2<br>treatment failure-----3<br>Lost to follow up-----4<br>Transfer out-----5<br>Died -----6<br>Transfer to MDR RX initiating center ...7<br>(write date of death:DD/MM/YY=-----/-----/----)7                                                    |

|      |                                                                               |                                                                                                                                                                                                                                  |
|------|-------------------------------------------------------------------------------|----------------------------------------------------------------------------------------------------------------------------------------------------------------------------------------------------------------------------------|
| 2.27 | Treatment outcome of the at 8 <sup>th</sup> months<br>(retreatment TB cases ) | Cured-----1<br>Treatment completed-----2<br>Failed-----3<br>Lost to follow up-----4<br>Died-----5<br>Transfer out-----6<br>Transfer to MDR RX initiating center ...7<br>Unkown-----8<br>Other(specify):-----98<br>Missing-----99 |
|------|-------------------------------------------------------------------------------|----------------------------------------------------------------------------------------------------------------------------------------------------------------------------------------------------------------------------------|
